# Supplementary material for: PREVALENCE AND TRAJECTORIES OF NEUROPSYCHOLOGICAL POST-COVID-19 SYMPTOMS IN INITIALLY HOSPITALIZED PATIENTS
Source: PubMed Central journal article supplement (PMC10949081; doi:10.2340/jrm.v56.25315), 2024-03-12
Supplement: JRM-56-25315-s2.pdf [file JRM-56-25315-s2.pdf]

Supplementary material has been published as submitted. It has not been copyedited, typeset or checked for scientific content by Journal of Rehabilitation Medicine

**Table SI. Screening instrument interpretation and psychometric properties**

| Questionnaire                                                                                      | Score for analysis (min-max)      | Interpretation (Higher score) | Cut-off score | Cronbach alpha     | Test-retest reliability | Sensitivity; specificity |
|----------------------------------------------------------------------------------------------------|-----------------------------------|-------------------------------|---------------|--------------------|-------------------------|--------------------------|
| Checklist for Cognitive Consequences following Intensive Care Admission (CLC-IC) <sup>a</sup> (1)  | Number of complaints (0-10)       | More complaints               | ≥4 (2)        | 0.81 (1)           |                         |                          |
| Fatigue Severity Scale (FSS) (3)                                                                   | Total score (9-63)                | Greater fatigue               | ≥36 (4)       | 0.96 (5)           | 0.74-0.86 (5)           |                          |
| Insomnia Severity Index (ISI) (6)                                                                  | Total score (0-38)                | More severe insomnia          | ≥10           | 0.74-0.91 (7, 8)   |                         | 0.86; 0.88 (7)           |
| Hospital Anxiety and Depression Scale (HADS) - Anxiety (9)                                         | Total subscale score (0-21)       | More anxiety                  | >7            | 0.68-0.93 (10)     |                         | 0.80; 0.80 (10)          |
| Hospital Anxiety and Depression Scale (HADS) - Depression (9)                                      | Total subscale score (0-21)       | More depression               | >7            | 0.67-0.90 (10)     |                         | 0.80; 0.80 (10)          |
| Primary Care Post-Traumatic Stress Disorder (PC-PTSD-5) (11)                                       | Number of symptoms (0-5)          | More symptoms                 | ≥ 3           | 0.80 (12)          |                         | 0.78; 0.87 (13)          |
| Utrecht Coping List (UCL) – passive coping subscale (14)                                           | Total score (7-28)                | More passive coping           | NA            | 0.73 (15)          | 0.87 (15)               |                          |
| Utrecht Scale for Evaluation of Rehabilitation-Participation (USER-P) – restrictions subscale (16) | Total subscale score (0-100)      | Fewer restrictions            | NA            | 0.90-0.91 (17, 18) |                         |                          |
| EuroQol-5D-5L (EQ-5D-5L) (19)                                                                      | Weighted health state index (0-1) | Greater health                | NA            | <sup>b</sup>       |                         |                          |

<sup>a</sup>The CLC-IC is an adapted version of the Checklist for Cognition and Emotion (CLCE-24).

<sup>b</sup> Internal consistency is less relevant for this questionnaire but a recent systematic review reported excellent psychometric properties across a range of populations. (20)

#### References:

1. Van Heugten C, Rasquin S, Winkens I, Beusmans G, Verhey F. Checklist for cognitive and emotional consequences following stroke (CLCE-24): development, usability and quality of the self-report version. *Clin Neurol Neurosurg* 2007; 109: 257-262. DOI: 10.1016/j.clineuro.2006.10.002.
2. van Rijsbergen MW, Mark RE, de Kort PL, Sitskoorn MM. Prevalence and profile of poststroke subjective cognitive complaints. *J Stroke Cerebrovasc Dis* 2015; 24: 1823-1831. DOI: 10.1016/j.jstrokecerebrovasdis.2015.04.017.
3. Krupp LB, LaRocca NG, Muir-Nash J, Steinberg AD. The fatigue severity scale: application to patients with multiple sclerosis and systemic lupus erythematosus. *Arch Neurol* 1989; 46: 1121-1123.
4. Shirley Ryan Ability Lab. Fatigue Severity Scale. 2016 [cited 2021 25.03]; Available from: <https://www.sralab.org/rehabilitation-measures/fatigue-severity-scale>.
5. Rosa K, Fu M, Gilles L, Cerri K, Peeters M, Bubb J, et al. Validation of the Fatigue Severity Scale in chronic hepatitis C. *Health and quality of life outcomes* 2014; 12: 1-12.

6. Morin CM. *Insomnia: Psychological assessment and management*: Guilford press; 1993.
7. Morin CM, Belleville G, Bélanger L, Ivers H. The Insomnia Severity Index: psychometric indicators to detect insomnia cases and evaluate treatment response. *Sleep* 2011; 34: 601-608.
8. Bastien CH, Vallières A, Morin CM. Validation of the Insomnia Severity Index as an outcome measure for insomnia research. *Sleep Med* 2001; 2: 297-307. DOI: 10.1016/s1389-9457(00)00065-4.
9. Zigmond AS, Snaith RP. The hospital anxiety and depression scale. *Acta Psychiatr Scand* 1983; 67: 361-370. DOI: 10.1111/j.1600-0447.1983.tb09716.x.
10. Bjelland I, Dahl A, Haug T, Neckelmann D. The validity of the Hospital Anxiety and Depression Scale: an updated literature review. *J Psychosom Res* 2002; 52:69-77.
11. Prins A, Ouimette P, Kimerling R, Cameron RP, Hugelshofer DS, Shaw-Hegwer J, et al. The primary care PTSD screen (PC-PTSD): development and operating characteristics. *Primary care psychiatry* 2003; 9: 9-14. DOI: 10.1185/135525703125002360.
12. Lathan EC, Petri JM, Haynes T, Sonu SC, Mekawi Y, Michopoulos V, et al. Evaluating the Performance of the Primary Care Posttraumatic Stress Disorder Screen for DSM-5 (PC-PTSD-5) in a Trauma-Exposed, Socioeconomically Vulnerable Patient Population. *J Clin Psychol Med Settings* 2023: 1-13.
13. Prins A, Bovin MJ, Smolenski DJ, Marx BP, Kimerling R, Jenkins-Guarnieri MA, et al. The primary care PTSD screen for DSM-5 (PC-PTSD-5): development and evaluation within a veteran primary care sample. *J Gen Intern Med* 2016; 31: 1206-1211.
14. Schreurs P, Van de Willige G, Brosschot J, Tellegen B, Graus G. Handleiding utrechtse coping lijst UCL (herziene versie). 1993. Available from: <https://bsw.ugent.be/VVGP/UCL.pdf>.
15. Turner H, Bryant-Waugh R, Peveler R, Bucks RS. A psychometric evaluation of an English version of the Utrecht Coping List. *European Eating Disorders Review* 2012; 20: 339-342.
16. Van Der Zee CH, Visser-Meily JM, Lindeman E, Jaap Kappelle L, Post MW. Participation in the chronic phase of stroke. *Top Stroke Rehabil* 2013; 20: 52-61. DOI: 10.1310/tsr2001-52.
17. Post MW, van der Zee CH, Hennink J, Schafrat CG, Visser-Meily JM, van Berlekom SB. Validity of the utrecht scale for evaluation of rehabilitation-participation. *Disabil Rehabil* 2012; 34: 478-485.
18. de Graaf JA, Volkens EJ, Schepers VP, Visser-Meily JM, Post MW. Validity of the Utrecht scale for evaluation of rehabilitation-participation restrictions scale in a hospital-based stroke population 3 months after stroke. *Top Stroke Rehabil* 2022; 29: 516-525.
19. Herdman M, Gudex C, Lloyd A, Janssen M, Kind P, Parkin D, et al. Development and preliminary testing of the new five-level version of EQ-5D (EQ-5D-5L). *Qual Life Res* 2011; 20: 1727-1736. DOI: 10.1007/s11136-011-9903-x.
20. Feng Y-S, Kohlmann T, Janssen MF, Buchholz I. Psychometric properties of the EQ-5D-5L: a systematic review of the literature. *Qual Life Res* 2021; 30: 647-673.

**Table SII. Transformation of Screening Instrument Scores into Percentiles**

|      | CLC-IC | FSS       | ISI       | HADS-A    | HADS-D    | PC-PTSD-5 |
|------|--------|-----------|-----------|-----------|-----------|-----------|
| 10%  | 1      | 0-6.3     | 0-3.7     | 0-3.0     | 0-3.0     | 0-1.4     |
| 20%  | 2      | 6.4-11.6  | 3.8-6.4   | 3.1-5.0   | 3.1-5.0   | 1.5-1.8   |
| 30%  | 3      | 11.7-16.9 | 6.5-9.1   | 5.1-7.0   | 5.1-7.0   | 1.9-2.2   |
| 40%  | 4      | 17.0-22.2 | 9.2-11.8  | 7.1-9.0   | 7.1-9.0   | 2.3-2.6   |
| 50%  | 5      | 22.3-27.5 | 11.9-14.5 | 9.1-11.0  | 9.1-11.0  | 2.7-3.0   |
| 60%  | 6      | 27.6-32.8 | 14.6-17.2 | 11.1-13.0 | 11.1-13.0 | 3.1-3.4   |
| 70%  | 7      | 32.9-38.1 | 17.3-19.9 | 13.1-15.0 | 13.1-15.0 | 3.5-3.8   |
| 80%  | 8      | 38.2-43.3 | 20.0-22.6 | 15.1-17.0 | 15.1-17.0 | 3.9-4.2   |
| 90%  | 9      | 43.4-48.7 | 22.7-25.3 | 17.1-19.0 | 17.1-19.0 | 4.3-4.6   |
| 100% | 10     | 48.8-54.0 | 25.4-28   | 19.1-21.0 | 19.1-21.0 | 4.7-5.0   |

CLC-IC= Checklist for Cognitive Consequences following Intensive Care Admission, FSS=Fatigue Severity Scale, ISI=Insomnia Severity Index, HADS-A=Hospital Anxiety and Depression Scale – Subscale Anxiety, HADS-D=Hospital Anxiety and Depression Scale – Subscale Depression, PC-PTSD-5= Primary Care Post-Traumatic Stress Disorder Screen for DSM-5.

*Note:* Difference scores were computed by subtracting T2 from T1 scores. Subsequently, the resulting difference scores were transformed into percentiles.

**Table III.** Demographic comparison of patients with a high vs. low number of unfavorable symptom trajectories.

|                                                    | Total<br>N = 184 |      | Low<br>N = 93 |      | High<br>N = 91 |      | p-value  |
|----------------------------------------------------|------------------|------|---------------|------|----------------|------|----------|
|                                                    | n                | %    | n             | %    | n              | %    |          |
| <i>Sex</i>                                         |                  |      |               |      |                |      |          |
| Male                                               | 130              | 70.7 | 72            | 77.4 | 58             | 63.7 | .042*    |
| Female                                             | 54               | 29.3 | 21            | 22.6 | 33             | 36.3 |          |
| <i>Education level</i>                             |                  |      |               |      |                |      |          |
| Low                                                | 33               | 17.9 | 14            | 15.1 | 19             | 20.9 | .073     |
| Medium                                             | 77               | 41.8 | 34            | 36.6 | 43             | 47.3 |          |
| High                                               | 74               | 40.2 | 45            | 48.4 | 29             | 31.9 |          |
| <i>Employment<sup>a</sup></i>                      |                  |      |               |      |                |      |          |
| Fulltime or half days                              | 91               | 49.5 | 54            | 58.1 | 37             | 40.7 | .026*    |
| Retired                                            | 60               | 32.6 | 28            | 30.1 | 32             | 35.2 |          |
| Unemployed                                         | 5                | 2.7  | 3             | 3.2  | 2              | 2.2  |          |
| Other <sup>b</sup>                                 | 28               | 15.2 | 8             | 8.6  | 20             | 22.0 |          |
| <i>Employment change</i>                           |                  |      |               |      |                |      |          |
| No                                                 | 125              | 67.9 | 73            | 78.5 | 52             | 57.1 | .002**   |
| Yes                                                | 59               | 32.1 | 20            | 21.5 | 39             | 42.9 |          |
| <i>Marital status<sup>a</sup></i>                  |                  |      |               |      |                |      |          |
| Married/Living together                            | 134              | 72.8 | 66            | 71.0 | 68             | 74.7 | .119     |
| In a relationship (not living together)            | 10               | 5.4  | 8             | 8.6  | 2              | 2.2  |          |
| Single                                             | 27               | 14.7 | 15            | 16.1 | 12             | 13.2 |          |
| Widow(er)                                          | 13               | 7.1  | 4             | 4.3  | 9              | 9.9  |          |
| <i>Received care after hospital discharge</i>      |                  |      |               |      |                |      |          |
| <i>Physical therapy</i>                            |                  |      |               |      |                |      |          |
| No                                                 | 49               | 26.8 | 33            | 35.9 | 16             | 17.6 | .005**   |
| Yes                                                | 134              | 73.2 | 59            | 64.1 | 75             | 82.4 |          |
| <i>Occupational therapy</i>                        |                  |      |               |      |                |      |          |
| No                                                 | 132              | 72.1 | 79            | 85.9 | 53             | 58.2 | <.001*** |
| Yes                                                | 51               | 27.9 | 13            | 14.1 | 38             | 41.8 |          |
| <i>Rehabilitation<sup>c</sup></i>                  |                  |      |               |      |                |      |          |
| No                                                 | 101              | 55.2 | 59            | 64.1 | 42             | 46.2 | .014*    |
| Yes                                                | 82               | 44.8 | 33            | 35.9 | 49             | 53.8 |          |
| <i>Psychology</i>                                  |                  |      |               |      |                |      |          |
| No                                                 | 142              | 77.6 | 84            | 91.3 | 58             | 63.7 | <.001*** |
| Yes                                                | 41               | 22.4 | 8             | 8.7  | 33             | 36.3 |          |
| <i>ICU</i>                                         |                  |      |               |      |                |      |          |
| No                                                 | 93               | 50.5 | 48            | 51.6 | 45             | 49.5 | .769     |
| Yes                                                | 91               | 49.5 | 45            | 48.4 | 46             | 50.5 |          |
| <i>Recovery expectation<sup>d</sup></i>            |                  |      |               |      |                |      |          |
| Full recovery                                      | 76               | 41.3 | 52            | 55.9 | 24             | 26.4 | <.001*** |
| Mild persistent symptoms                           | 90               | 48.9 | 36            | 38.7 | 54             | 59.3 |          |
| Severe persistent symptoms                         | 18               | 9.8  | 5             | 5.4  | 13             | 14.3 |          |
| <i>Pre-COVID-19 psychological care<sup>e</sup></i> |                  |      |               |      |                |      |          |
| No                                                 | 136              | 73.9 | 79            | 84.9 | 57             | 62.6 | <.001*** |
| Yes                                                | 48               | 26.1 | 14            | 15.1 | 34             | 37.4 |          |

<sup>a</sup>Fisher's exact (at least one cell has an expected count less than 5).

<sup>b</sup>Out of which 60.7% (17/28) were on sick leave and 17.9% (5/28) were occupationally disabled.

<sup>c</sup>Includes in-clinic and out-of-clinic rehabilitation.

<sup>d</sup>Patients were asked to which extent they expected to recover from COVID-19.

<sup>e</sup>Patients self-reported whether they received any kind of psychological care in the past.

*Note.* The patients' scores on six screening instruments were categorized into four trajectories: persistent symptoms, delayed-onset symptoms, remitted symptoms, and absent symptoms. The first two trajectories, persistent and delayed-onset symptoms, were deemed unfavorable. Each patient could exhibit a minimum of zero and a maximum of six unfavorable trajectories, corresponding to one per screening instrument. The table presented above contrasts patients with up to one (*low*) and more than one (*high*) unfavorable trajectory.
